# Supplementary material for: Strain and Strain Rate Tensor Mapping of Medial Gastrocnemius at Submaximal Isometric Contraction and Three Ankle Angles
Source: MDPI journal article supplement (doi:10.3390/tomography9020068), 2023-04-11
Supplement: s1 [file s1]

**Table S1:** Strain rate indices for different ankle angles and % MVC

| Ankle Position | %MVC | Peak Force (N) | SR <sub>A1</sub> * | SR <sub>A2</sub> | SR <sub>out-plane</sub> | SR <sub>max</sub> * |
|----------------|------|----------------|--------------------|------------------|-------------------------|---------------------|
| Plantarflexion | 50   | 32 ± 6.959     | -324.697 ± 29.449  | 183.309 ± 28.704 | -26.378 ± 88.06         | -254.003 ± 25.226   |
|                | 25   | 16.72 ± 3.694  | -241.874 ± 40.046  | 176.408 ± 63.533 | -5.21 ± 43.613          | -209.141 ± 50.796   |
| Neutral        | 50   | 74.24 ± 9.655  | -411.813 ± 37.634  | 246.392 ± 39.333 | -11.343 ± 83.468        | -329.102 ± 33.821   |
|                | 25   | 37.68 ± 4.883  | -324.148 ± 53.897  | 192.114 ± 47.256 | -13.302 ± 75.636        | -258.131 ± 41.771   |
| Dorsiflexion   | 50   | 141.2 ± 9.246  | -399.438 ± 68.12   | 261.62 ± 29.642  | -40.484 ± 37.226        | -330.529 ± 36.1     |
|                | 25   | 73.82 ± 4.26   | -252.608 ± 51.87   | 199.064 ± 26.901 | -125.611 ± 74.794       | -225.836 ± 35.655   |

\* Significant difference between 25% and 50% MVC
