# Supplementary material for: Strain and Strain Rate Tensor Mapping of Medial Gastrocnemius at Submaximal Isometric Contraction and Three Ankle Angles
Source: MDPI journal article supplement (doi:10.3390/tomography9020068), 2023-04-11
Supplement: s1 [file s1]

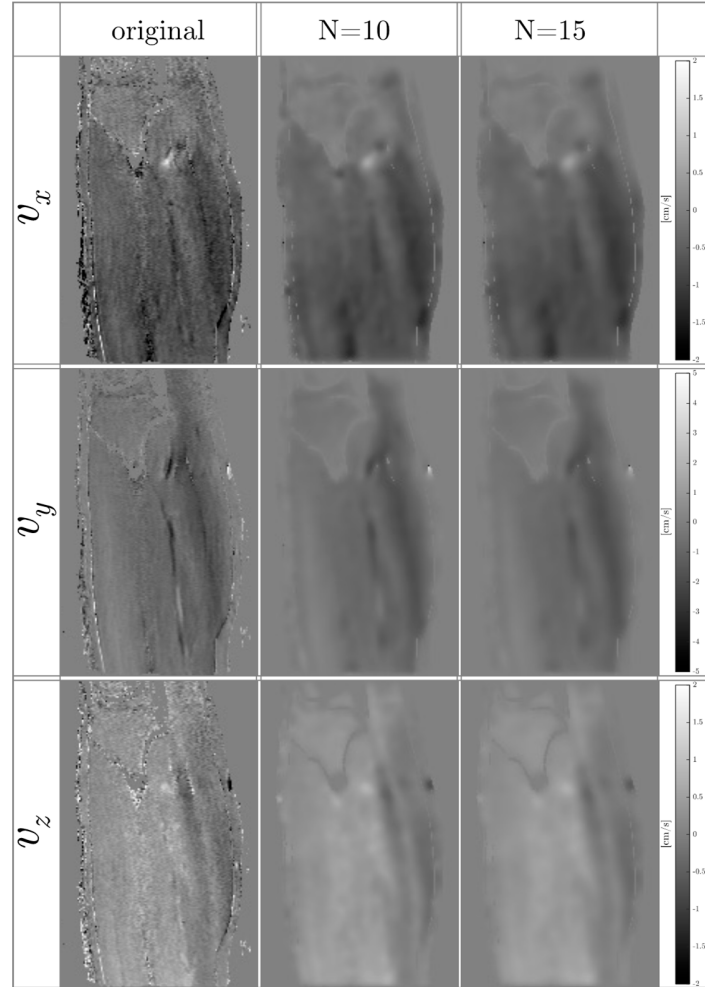

Figure S1: Sagittal oblique phase images of the lower leg derived from velocity encoded along x-, y-, and z- directions are shown in the three rows respectively in the first column. The second and third columns show the corresponding images denoised with the anisotropic diffusion filter with iterations of N=10 (middle column) and N=15 (right column). The denoising is visually evident at both iterations while an increase in blurring is seen at the N=15 iteration.
